# Supplementary material for: A facile and efficient strategy for the design of ferroelectric and giant dielectric hybrids via intercalating polar molecules into noncentrosymmetric layered inorganic compounds
Source: Royal Society of Chemistry journal article supplement (doi:10.1039/c1jm13115j), 2011-11-09
Supplement: c1jm13115j.pdf [file c1jm13115j.pdf]

## ESI

### **A facile and efficient strategy for design of ferroelectric and giant dielectric hybrids via intercalating polar molecules into noncentrosymmetric layered inorganic compound**

Shun-Ping Zhao,<sup>a, b</sup> Hong Gao,<sup>c</sup> Xiao-Ming Ren,<sup>\* a, c</sup> Guo-Jun Yuan,<sup>a</sup> Yi-Nong Lu<sup>\* c</sup>

<sup>a</sup> State Key Laboratory of Materials-Oriented Chemical Engineering and College of Science, Nanjing University of Technology, Nanjing 210009, P. R. China

<sup>b</sup> Department of Chemistry & Chemical engineering, Anqing Teachers College, Anqing 246011, P.R. China

<sup>c</sup> State Key Laboratory of Materials-Oriented Chemical Engineering and College of Materials science and Engineering, Nanjing University of Technology, Nanjing 210009, P. R. China

Tel.: +86 25 83587820

Fax: +86 25 83587820

Email: [xmren@njut.edu.cn](mailto:xmren@njut.edu.cn)

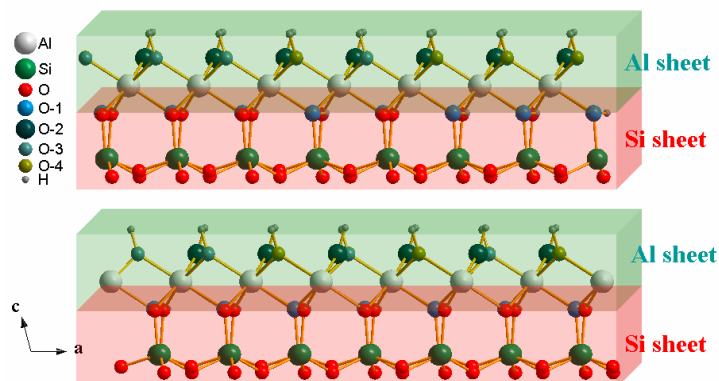

**Figure S1** Layered structure of Kaolinite.

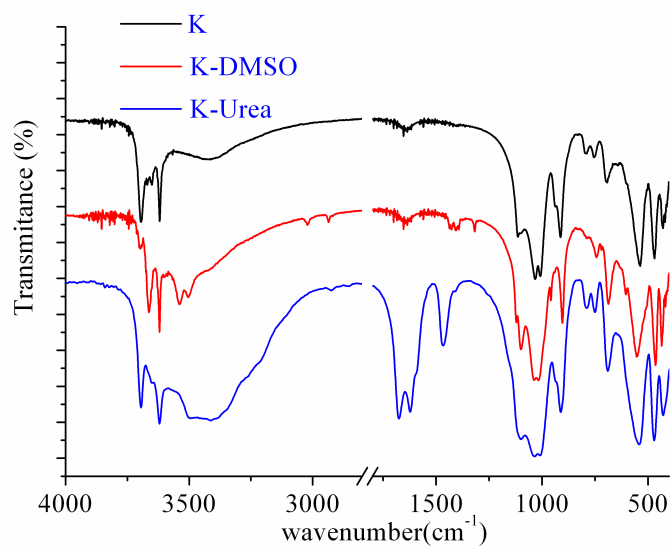

**Figure S2** IR spectra of intercalated and raw Kaolinites.

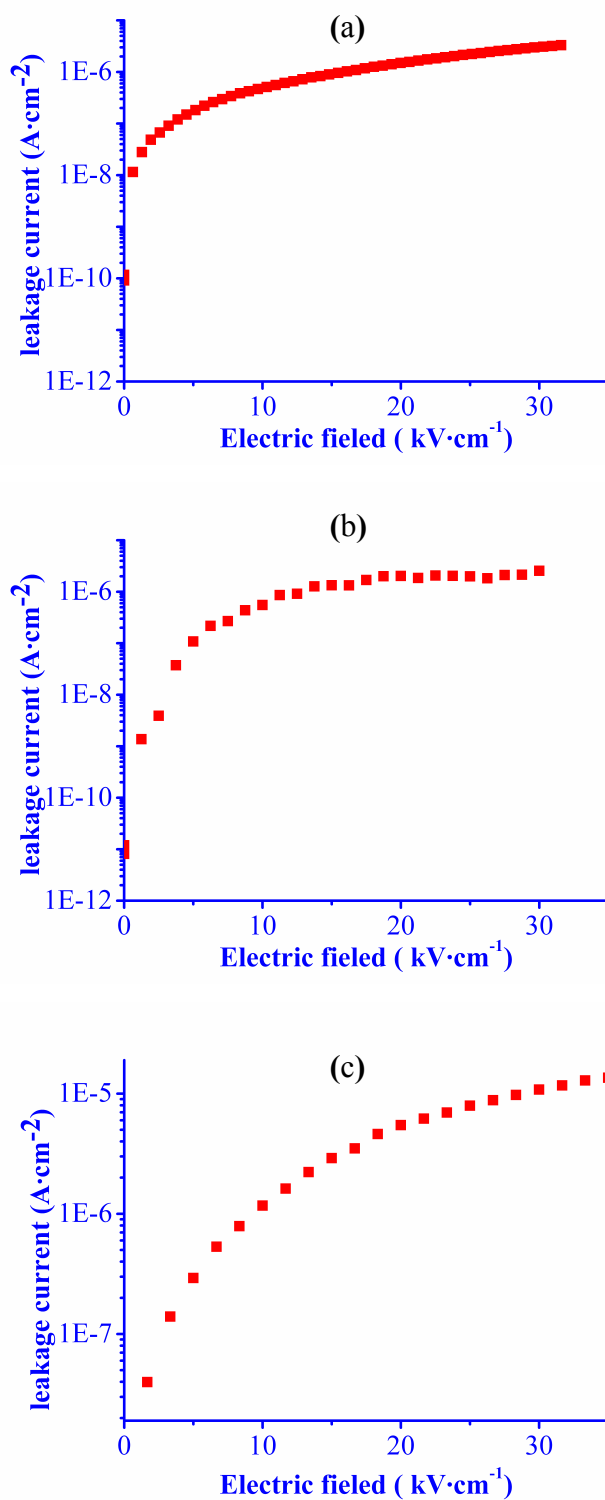

**Figure S3** Plots of leakage current versus applied electric field for (a) K-DMSO, (b) K-Urea samples and (c) raw Kaolinite.

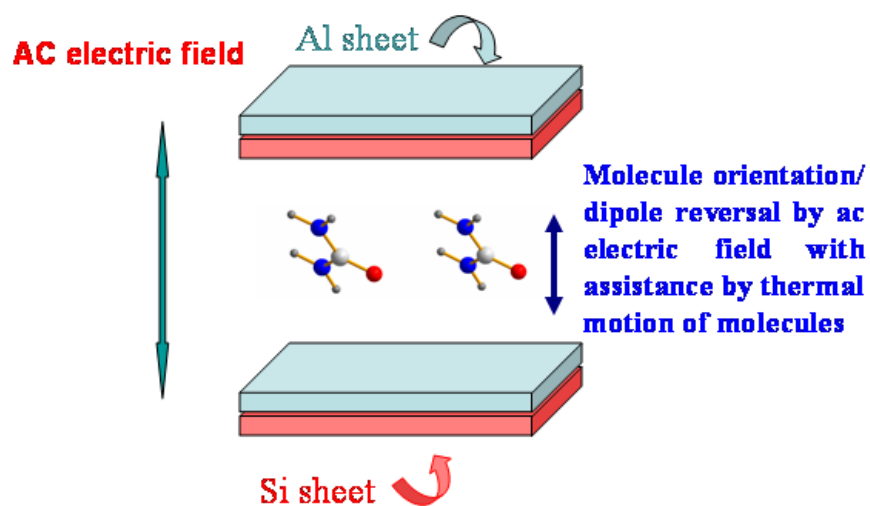

**Figure S4** Schematic illustration for the dipole reversal of urea molecules resulted from the motions of urea molecule flipping motion by electric field with assistance by thermal motion of molecules for K-Urea.

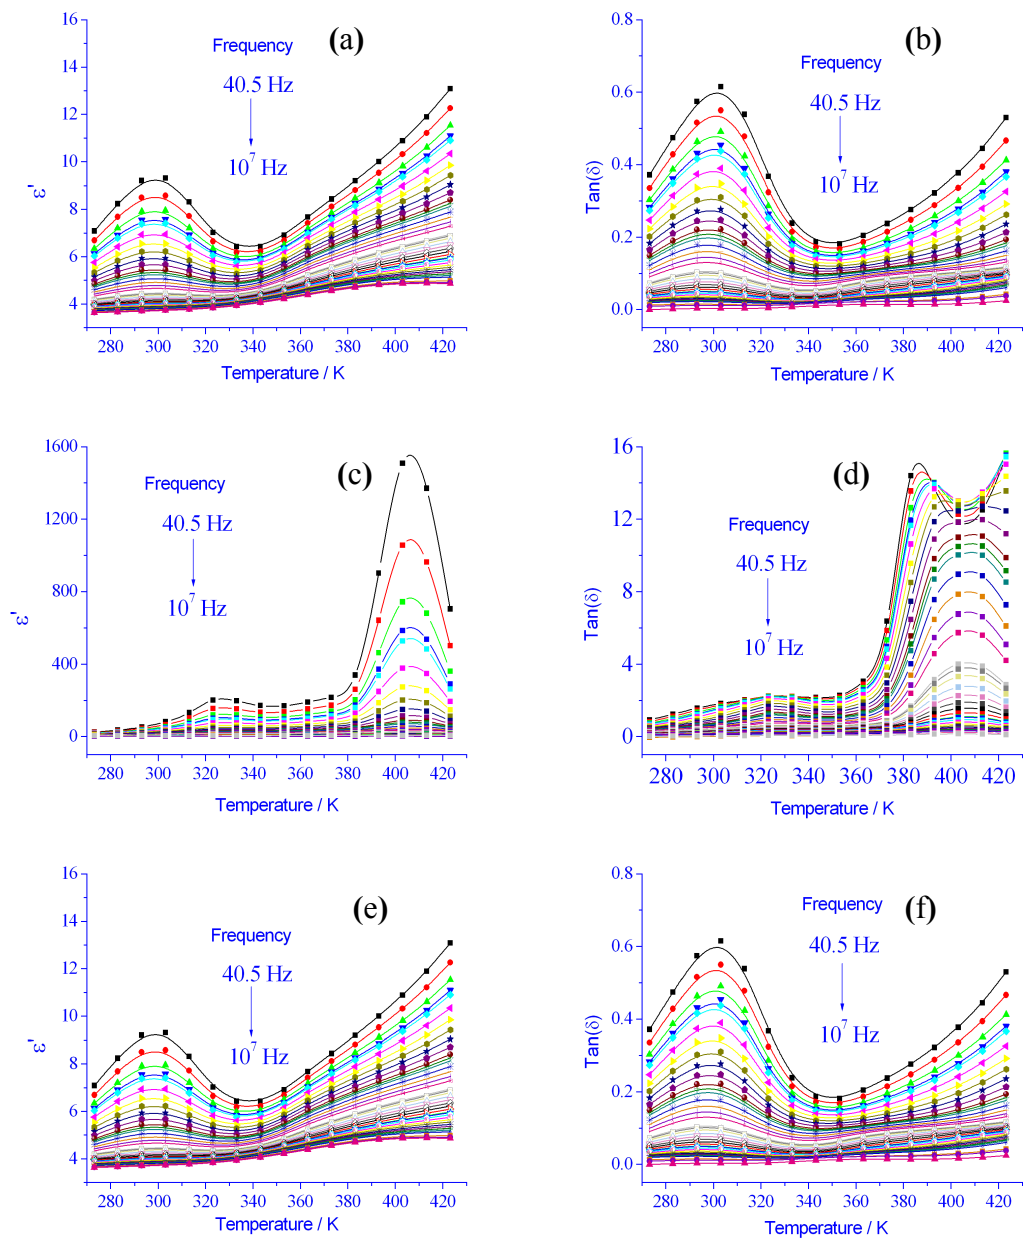

**Figure S5** Temperature dependence of  $\epsilon'$  and  $\tan\delta$  of (a, b) K-DMSO (c, d) K-Urea intercalation compounds and (e, f) raw Kaolinite at  $f = 40.5 \sim 10^7$  Hz and 273~423K.
